# Supplementary material
Source: HighWire-hosted journal article supplement (https://bmjopen.bmj.com/content/8/6/e021599)
Supplement: inline-supplementary-material-1 [file inline-supplementary-material-1.pdf]

# Greenness and Job-related Chronic Stress in Young Adults: A Prospective Cohort Study in Germany

## Supplementary material

**Table S1.** Median, Inter quartile range (IQR) and total of missing data for average of NVDI at 500 m buffer by each city and follow-up.

| City    | Follow-up | Median | IQR         | Missing |
|---------|-----------|--------|-------------|---------|
| Munich  | SOLAR I   | 0.31   | (0.26-0.34) | 10      |
|         | SOLAR II  | 0.31   | (0.26-0.34) | 20      |
| Dresden | SOLAR I   | 0.36   | (0.31-0.41) | 28      |
|         | SOLAR II  | 0.34   | (0.30-0.40) | 59      |
| Total   | SOLAR I   | 0.33   | (0.29-0.37) | 75      |
|         | SOLAR II  | 0.32   | (0.27-0.37) | 126     |

## NVDI distributions at each follow-up

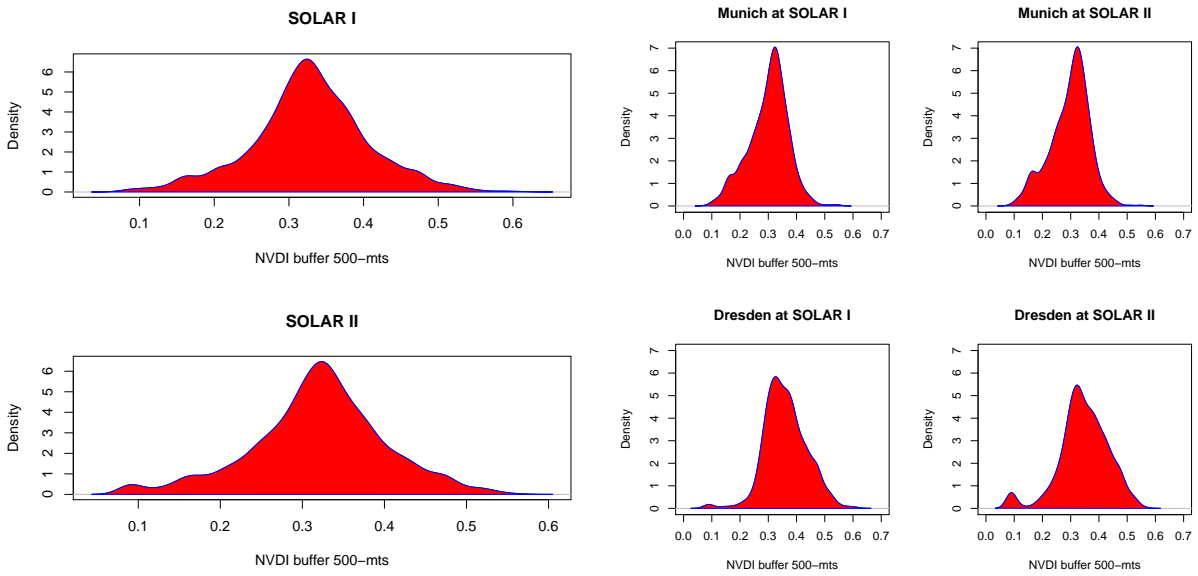

**Figure S1.** Distribution of NVDI in a 500 m buffer by city and follow-up

**Table S2.** Comparison between analyses of the unadjusted and adjusted association between residential greenness in a 500 m buffer around SOLAR participants home and job-related chronic stress.

| Variable                        | Unadjusted      |             |               |              | Adjusted        |             |               |             |
|---------------------------------|-----------------|-------------|---------------|--------------|-----------------|-------------|---------------|-------------|
|                                 | Work discontent |             | Work overload |              | Work discontent |             | Work overload |             |
|                                 | OR              | (CI95%)     | OR            | (CI95%)      | OR              | (CI95%)     | OR            | (CI95%)     |
| <b>Munich</b>                   |                 |             |               |              |                 |             |               |             |
| Greenness Q1                    | 1               | 1           | 1             | 1            | 1               | 1           | 1             | 1           |
| Greenness Q2                    | 0.85            | (0.78-0.94) | 0.94          | (0.86-1.03)  | 0.93            | (0.83-1.05) | 0.86          | (0.77-0.96) |
| Greenness Q3                    | 0.76            | (0.69-0.83) | 0.78          | (0.71-0.86)  | 0.87            | (0.76-0.99) | 0.76          | (0.67-0.87) |
| Greenness Q4                    | 0.87            | (0.79-0.96) | 0.96          | (0.87-1.05)  | 0.92            | (0.78-1.07) | 0.80          | (0.68-0.93) |
| <b>Dresden</b>                  |                 |             |               |              |                 |             |               |             |
| Greenness Q1                    | 1               | 1           | 1             | 1            | 1               | 1           | 1             | 1           |
| Greenness Q2                    | 1.06            | (0.96-1.19) | 0.96          | (0.87-1.07)  | 1.04            | (0.92-1.19) | 0.92          | (0.81-1.04) |
| Greenness Q3                    | 1.00            | (0.90-1.12) | 1.00          | (0.90-1.11)  | 0.98            | (0.86-1.12) | 0.77          | (0.68-0.88) |
| Greenness Q4                    | 0.94            | (0.85-1.05) | 0.94          | (0.85-1.04)  | 1.05            | (0.91-1.22) | 0.89          | (0.77-1.03) |
| <b>Both cities</b>              |                 |             |               |              |                 |             |               |             |
| Greenness Q1                    | 1               | 1           | 1             | 1            | 1               | 1           | 1             | 1           |
| Greenness Q2                    | 0.83            | (0.78-0.90) | 0.90          | (0.84-0.96)  | 0.92            | (0.85-1.00) | 0.89          | (0.82-0.96) |
| Greenness Q3                    | 0.82            | (0.77-0.88) | 0.88          | (0.83-0.95)  | 0.92            | (0.84-1.01) | 0.82          | (0.75-0.90) |
| Greenness Q4                    | 0.80            | (0.75-0.86) | 0.90          | (0.84-0.96)  | 0.89            | (0.80-0.99) | 0.87          | (0.78-0.96) |
| <b>Total non-movers (n=675)</b> |                 |             |               |              |                 |             |               |             |
| <b>Munich</b>                   |                 |             |               |              |                 |             |               |             |
| Greenness Q1                    | 1               | 1           | 1             | 1            | 1               | 1           | 1             | 1           |
| Greenness Q2                    | 0.90            | (0.80-1.02) | 1.02          | (0.89 -1.17) | 0.89            | (0.77-1.03) | 0.86          | (0.74-1.00) |
| Greenness Q3                    | 0.84            | (0.74-0.96) | 0.91          | (0.80 -1.05) | 0.83            | (0.72-0.96) | 0.74          | (0.63-0.86) |
| Greenness Q4                    | 0.85            | (0.75-0.96) | 1.11          | (0.97 -1.26) | 0.89            | (0.76-1.04) | 0.89          | (0.74-1.07) |
| <b>Dresden</b>                  |                 |             |               |              |                 |             |               |             |
| Greenness Q1                    | 1               | 1           | 1             | 1            | 1               | 1           | 1             | 1           |
| Greenness Q2                    | 0.75            | (0.60-0.95) | 0.92          | (0.75-1.14)  | 0.83            | (0.63-1.08) | 0.76          | (0.58-1.00) |
| Greenness Q3                    | 1.03            | (0.84-1.28) | 0.97          | (0.79-1.19)  | 1.16            | (0.88-1.53) | 0.71          | (0.55-0.91) |
| Greenness Q4                    | 0.85            | (0.68-1.07) | 1.05          | (0.85-1.30)  | 1.15            | (0.83-1.59) | 0.61          | (0.45-0.82) |
| <b>Both cities</b>              |                 |             |               |              |                 |             |               |             |
| Greenness Q1                    | 1               | 1           | 1             | 1            | 1               | 1           | 1             | 1           |
| Greenness Q2                    | 0.84            | (0.75-0.93) | 0.87          | (0.78-0.97)  | 0.90            | (0.80-1.01) | 0.83          | (0.74-0.94) |
| Greenness Q3                    | 0.82            | (0.74-0.91) | 0.99          | (0.89-1.11)  | 0.89            | (0.79-1.01) | 0.86          | (0.75-0.98) |
| Greenness Q4                    | 0.84            | (0.75-0.94) | 1.03          | (0.92-1.15)  | 0.88            | (0.76-1.02) | 0.78          | (0.67-0.89) |

## Multiple imputation results

**Table S3.** Comparison between analyses of the imputed data and the complete cases analyses of the adjusted association between residential greenness in a 500 m buffer around SOLAR participants home and job-related chronic stress. Complete cases in combined population (n=1430), Munich (n=779) and Dresden (n=651). Complete cases for non-movers in combined population (n=629), Munich (n=443) and Dresden (186)

| Variable                              | Imputed |             |      |             | Complete cases |             |      |             |
|---------------------------------------|---------|-------------|------|-------------|----------------|-------------|------|-------------|
|                                       | OR      | (CI95%)     | OR   | (CI95%)     | OR             | (CI95%)     | OR   | (CI95%)     |
| <b>Movers and non-movers (n=1632)</b> |         |             |      |             |                |             |      |             |
| <b>Munich</b>                         |         |             |      |             |                |             |      |             |
| Greenness Q1                          | 1       | 1           | 1    | 1           | 1              | 1           | 1    | 1           |
| Greenness Q2                          | 0.93    | (0.75-0.94) | 0.83 | (0.67-1.03) | 0.93           | (0.83-1.05) | 0.86 | (0.77-0.96) |
| Greenness Q3                          | 0.85    | (0.66-1.08) | 0.73 | (0.57-0.94) | 0.87           | (0.76-0.99) | 0.76 | (0.67-0.87) |
| Greenness Q4                          | 0.82    | (0.61-1.11) | 0.77 | (0.58-1.03) | 0.92           | (0.78-1.07) | 0.80 | (0.68-0.93) |
| <b>Dresden</b>                        |         |             |      |             |                |             |      |             |
| Greenness Q1                          | 1       | 1           | 1    | 1           | 1              | 1           | 1    | 1           |
| Greenness Q2                          | 1.01    | (0.80-1.27) | 0.93 | (0.73-1.18) | 1.04           | (0.92-1.19) | 0.92 | (0.81-1.04) |
| Greenness Q3                          | 0.93    | (0.74-1.17) | 0.81 | (0.63-1.04) | 0.98           | (0.86-1.12) | 0.77 | (0.68-0.88) |
| Greenness Q4                          | 1.00    | (0.76-1.32) | 0.87 | (0.63-1.14) | 1.05           | (0.91-1.22) | 0.89 | (0.77-1.03) |
| <b>Both cities</b>                    |         |             |      |             |                |             |      |             |
| Greenness Q1                          | 1       | 1           | 1    | 1           | 1              | 1           | 1    | 1           |
| Greenness Q2                          | 0.90    | (0.77-1.05) | 0.89 | (0.76-1.03) | 0.92           | (0.85-1.00) | 0.89 | (0.82-0.96) |
| Greenness Q3                          | 0.89    | (0.76-1.05) | 0.85 | (0.72-1.00) | 0.92           | (0.84-1.01) | 0.82 | (0.75-0.90) |
| Greenness Q4                          | 0.84    | (0.70-1.01) | 0.88 | (0.73-1.06) | 0.89           | (0.80-0.99) | 0.87 | (0.78-0.96) |
| <b>Total non-movers (n=675)</b>       |         |             |      |             |                |             |      |             |
| <b>Munich</b>                         |         |             |      |             |                |             |      |             |
| Greenness Q1                          | 1       | 1           | 1    | 1           | 1              | 1           | 1    | 1           |
| Greenness Q2                          | 0.90    | (0.69-1.17) | 0.88 | (0.66-1.17) | 0.89           | (0.77-1.03) | 0.86 | (0.74-1.00) |
| Greenness Q3                          | 0.83    | (0.63-1.09) | 0.73 | (0.54-0.99) | 0.83           | (0.72-0.96) | 0.74 | (0.63-0.86) |
| Greenness Q4                          | 0.81    | (0.60-1.11) | 0.93 | (0.67-1.31) | 0.89           | (0.76-1.04) | 0.89 | (0.74-1.07) |
| <b>Dresden</b>                        |         |             |      |             |                |             |      |             |
| Greenness Q1                          | 1       | 1           | 1    | 1           | 1              | 1           | 1    | 1           |
| Greenness Q2                          | 0.73    | (0.43-1.23) | 0.79 | (0.47-1.32) | 0.83           | (0.63-1.08) | 0.76 | (0.58-1.00) |
| Greenness Q3                          | 1.09    | (0.67-1.77) | 0.76 | (0.47-1.23) | 1.16           | (0.88-1.53) | 0.71 | (0.55-0.91) |
| Greenness Q4                          | 0.99    | (0.54-1.84) | 0.59 | (0.32-1.00) | 1.15           | (0.83-1.59) | 0.61 | (0.45-0.82) |
| <b>Both cities</b>                    |         |             |      |             |                |             |      |             |
| Greenness Q1                          | 1       | 1           | 1    | 1           | 1              | 1           | 1    | 1           |
| Greenness Q2                          | 0.88    | (0.76-0.93) | 0.89 | (0.77-1.03) | 0.90           | (0.80-1.01) | 0.83 | (0.74-0.94) |
| Greenness Q3                          | 0.86    | (0.74-1.00) | 0.85 | (0.73-0.99) | 0.89           | (0.79-1.01) | 0.86 | (0.75-0.98) |
| Greenness Q4                          | 0.80    | (0.68-0.94) | 0.88 | (0.75-1.03) | 0.88           | (0.76-1.02) | 0.78 | (0.67-0.89) |
